# Supplementary material for: Vibrational Study on Structure and Bioactivity of Protein Fibers Grafted with Phosphorylated Methacrylates
Source: MDPI journal article supplement (doi:10.3390/molecules26216487), 2021-10-27
Supplement: s1 [file s1]

# Vibrational study on structure and bioactivity of protein fibers grafted with phosphorylated methacrylates

Michele Di Foggia, Masuhiro Tsukada and Paola Taddei

**Table S1.** Main Raman band wavenumbers and assignments for *B. mori* silk fibroin fabrics before (B m control) and after grafting with phosmer CL, weight gain 26.5% (B m CL 26.5%) and phosmer M, weight gain 22.8% (B m M 22.8%). The bands having a contribution from phosmers are indicated with asterisks (assignments in bold characters).

| B m control<br>$\tilde{\nu} / \text{cm}^{-1}$ | B m CL 26.5%<br>$\tilde{\nu} / \text{cm}^{-1}$ | B m M 22.8%<br>$\tilde{\nu} / \text{cm}^{-1}$ | Assignments                                                                                                                       |
|-----------------------------------------------|------------------------------------------------|-----------------------------------------------|-----------------------------------------------------------------------------------------------------------------------------------|
|                                               | 1725 w                                         | 1725 w                                        | <b>ester C=O stretching of phosmer [28] *</b>                                                                                     |
| 1667 s                                        | 1667 s                                         | 1667 s                                        | Amide I of $\beta$ -sheet conformation [29,30,37]                                                                                 |
| 1616 w                                        | 1615 w                                         | 1615 w                                        | Trp, Tyr, and Phe of silk fibroin [29,30,37]                                                                                      |
| 1600 w                                        | 1599 w                                         | 1601 w                                        | Trp and Phe of silk fibroin [29,30,37] and <b>phosphorylated Tyr [36] *</b>                                                       |
| 1555 vw                                       | 1555 vw                                        | 1555 vw                                       | Trp of silk fibroin [29,30,37]                                                                                                    |
|                                               | 1485 sh                                        | 1485 sh                                       | <b>CH<sub>2</sub> and CH<sub>3</sub> bending of polymerized phosmer [33] *</b>                                                    |
| 1451 m                                        | 1449 s                                         | 1451 s                                        | CH <sub>2</sub> bending in silk fibroin [29,30,37] and <b>CH<sub>2</sub> and CH<sub>3</sub> bending of grafted phosmer [28] *</b> |
| 1403 w                                        | 1403 w                                         | 1403 w                                        | C(CH <sub>3</sub> ) <sub>2</sub> antisymmetric bending of silk fibroin [29,30,37] and Ser [41]                                    |
| 1368 vw                                       | 1368 vw                                        | 1368 vw                                       | Trp of silk fibroin [29,37]                                                                                                       |
| 1264 m                                        | 1265 m                                         | 1266 m                                        | Amide III of unordered conformation [29,30,37]                                                                                    |
| 1229 s                                        | 1227 s                                         | 1229 s                                        | Amide III of $\beta$ -sheet conformation [29,30,37]                                                                               |
| 1171 mw                                       | 1171 mw                                        | 1171 mw                                       | CC stretching mode of unordered conformation [29,37]                                                                              |
| 1163 mw                                       | 1163 mw                                        | 1163 mw                                       | CC stretching mode of $\beta$ -sheet conformation [29,37]                                                                         |
|                                               | 1125 vw                                        | 1125 vw                                       | <b>CC stretching of polymerized phosmer [31,32] *</b>                                                                             |
| 1085 s                                        | 1085 s                                         | 1085 s                                        | CC skeletal stretching mode of $\beta$ -sheet conformation [29,30,37]                                                             |
| 1032 w                                        | 1032 w                                         | 1034 w                                        | Phe and CC skeletal stretching of silk fibroin [29,37] and <b>CC stretching of polymerized phosmer [31,32] *</b>                  |
| 1004 w                                        | 1004 w                                         | 1004 w                                        | Phe of silk fibroin [29,30,37]                                                                                                    |
| 979 w                                         | 977 w                                          | 979 w                                         | CH <sub>3</sub> rocking mode of $\beta$ -sheet conformation [29,37]                                                               |
| 882 w                                         | 882 w                                          | 882 w                                         | CH <sub>2</sub> rocking mode of $\beta$ -sheet conformation [29,37]                                                               |
| 854 w                                         | 854 w                                          | 854 w                                         | Tyr of silk fibroin [29,30,37] and <b>CH<sub>2</sub> in-plane bending of phosmer [32] *</b>                                       |
| 829 w                                         | 829 w                                          | 829 w                                         | Tyr of silk fibroin [29,30,37] and <b>CH<sub>2</sub> in-plane bending of phosmer [32] *</b>                                       |
|                                               | 810 sh                                         | 810 sh                                        | <b>phosphorylated Tyr and Ser [36] *</b>                                                                                          |
| 760 vw                                        | 760 vw                                         | 760 vw                                        | Trp of silk fibroin [29,30] and <b>C-Cl and C-C stretching of phosmers [28] *</b>                                                 |
|                                               | 706 vw                                         |                                               | <b>C-Cl stretching of phosmer CL [28] *</b>                                                                                       |
| 644 w                                         | 644 w                                          | 644 w                                         | Tyr of silk fibroin [29,37]                                                                                                       |
| 622 vw                                        | 622 vw                                         | 622 vw                                        | Phe of silk fibroin [29]                                                                                                          |
|                                               | 603 vw                                         | 603 w                                         | <b>CCO symmetric stretching of phosmer [31,32] *</b>                                                                              |

v = very; w = weak; m = medium; s = strong; sh = shoulder.  
Trp = tryptophan; Phe = phenylalanine; Tyr = tyrosine, Ser = serine.

**Table S2.** Main IR band wavenumbers and assignments for *B. mori* silk fibroin fabrics before (B m control) and after grafting with phosmer CL, weight gain 26.5% (B m CL 26.5%) and phosmer M, weight gain 22.8% (B m M 22.8%). The bands having a contribution from phosmers are indicated with asterisks (assignments in bold characters).

| B m control<br>$\tilde{\nu} / \text{cm}^{-1}$ | B m CL 26.5%<br>$\tilde{\nu} / \text{cm}^{-1}$ | B m M 22.8%<br>$\tilde{\nu} / \text{cm}^{-1}$ | Assignments                                                                           |
|-----------------------------------------------|------------------------------------------------|-----------------------------------------------|---------------------------------------------------------------------------------------|
|                                               | 1732 w                                         | 1726 w                                        | <b>ester C=O stretching of phosmer [31,32] *</b>                                      |
| 1697 sh                                       | 1697 sh                                        | 1697 sh                                       | Amide I of anti-parallel $\beta$ -sheet conformation [44,45]                          |
|                                               | 1693 sh                                        | 1692 sh                                       | <b>ester C=O stretching of phosmer [31,32] *</b>                                      |
| 1617 s                                        | 1617 s                                         | 1621 s                                        | Amide I of $\beta$ -sheet conformation [44,45]                                        |
| 1511 s                                        | 1513 s                                         | 1511 s                                        | Amide II of $\beta$ -sheet conformation [44,45]                                       |
|                                               | 1453 sh                                        | 1454 sh                                       | <b>CH<sub>2</sub> and CH<sub>3</sub> bending of phosmer [31,32] *</b>                 |
| 1440 m                                        | 1440 m                                         | 1440 m                                        | CH <sub>2</sub> bending in silk fibroin [44,45]                                       |
| 1405 w                                        | 1403 vw                                        | 1405 vw                                       | Ser of silk fibroin [46,47]                                                           |
| 1261 sh                                       |                                                |                                               | Amide III of unordered conformation [44,45]                                           |
|                                               | 1255 sh                                        | 1255 sh                                       | <b>P=O stretching of phosphate group [17,43] *</b>                                    |
| 1226 m                                        |                                                |                                               | Amide III of $\beta$ -sheet conformation [44,45]                                      |
| 1163 m                                        | 1161 m                                         | 1161 m                                        | CC stretching in silk fibroin [44,45]                                                 |
|                                               | 1152 sh                                        | 1146 sh                                       | <b>COC antisymmetric stretching of phosmer [31,32] and P-O-C stretching [17,43] *</b> |
| 1030 sh                                       | 1036 m                                         | 1036 m                                        | CC stretching in silk fibroin [44,45] and <b>P-O stretching [17,43] *</b>             |
|                                               | 999 vw                                         | 1001 vw                                       | <b>P-O stretching [17,43] *</b>                                                       |
| 997 vw                                        | 997 sh                                         | 997 sh                                        | Ala-Gly sequences in silk fibroin [44,45]                                             |
| 976 vw                                        | 976 vw                                         | 976 vw                                        | Ala-Gly sequences in silk fibroin [44,45]                                             |
|                                               | 880 vw                                         | 877 vw                                        | <b>CH<sub>2</sub> rocking of phosmer [31] *</b>                                       |
|                                               | 830 vw                                         | 830 vw                                        | <b>P-O-C bending [31] *</b>                                                           |

v = very; w = weak; m = medium; s = strong; sh = shoulder.  
Ser = serine.

**Table S3.** Main Raman band wavenumbers and assignments for Tussah silk fibroin fabrics before (T control) and after grafting with phosmer CL, weight gain 13.7% (T CL 13.7%) and phosmer M, weight gain 12.4% (T M 12.4%). The bands having a contribution from phosmers are indicated with asterisks (assignments in bold characters).

| T m control<br>$\tilde{\nu} / \text{cm}^{-1}$ | T CL 13.7%<br>$\tilde{\nu} / \text{cm}^{-1}$ | T M 12.4%<br>$\tilde{\nu} / \text{cm}^{-1}$ | Assignments                                                                                                                |
|-----------------------------------------------|----------------------------------------------|---------------------------------------------|----------------------------------------------------------------------------------------------------------------------------|
|                                               | 1720 w                                       | 1720 w                                      | <b>ester C=O stretching of phosmer [28] *</b>                                                                              |
| 1668 s                                        | 1668 s                                       | 1668 s                                      | Amide I of $\beta$ -sheet conformation [48-50]                                                                             |
| 1614 w                                        | 1614 w                                       | 1614 w                                      | Trp, Tyr, and Phe of silk fibroin [29]                                                                                     |
| 1600 w                                        | 1599 w                                       | 1599 w                                      | Trp and Phe of silk fibroin [29] and <b>phosphorylated Tyr [36] *</b>                                                      |
| 1555 vw                                       | 1555 vw                                      | 1552 vw                                     | Trp of silk fibroin [29]                                                                                                   |
| 1452 m                                        | 1450 s                                       | 1450 s                                      | <b>CH<sub>2</sub> bending in silk fibroin [29] and CH<sub>2</sub> and CH<sub>3</sub> bending of grafted phosmer [28] *</b> |
| 1398 w                                        | 1398 w                                       | 1398 w                                      | C(CH <sub>3</sub> ) <sub>2</sub> antisymmetric bending of silk fibroin [29] and Ser [41]                                   |
| 1365 vw                                       | 1365 vw                                      | 1365 vw                                     | Trp of silk fibroin [29]                                                                                                   |
| 1270÷1260 sh br                               | 1270÷1260 sh br                              | 1270÷1260 sh br                             | Amide III of $\alpha$ -helix and unordered conformations [48-50]                                                           |
| 1242-1230 s                                   | 1242-1230 s                                  | 1242-1230 s                                 | Amide III of $\beta$ -sheet conformation [48-50]                                                                           |
|                                               | 1128 w                                       | 1128 w                                      | <b>CC stretching of polymerized phosmer [31,32] *</b>                                                                      |
| 1094 s                                        | 1094 s                                       | 1094 s                                      | Ala-rich sequences in $\beta$ -sheet conformation [48-50]                                                                  |
| 1069 s                                        | 1069 s                                       | 1069 s                                      | Ala-rich sequences in $\beta$ -sheet conformation [48-50]                                                                  |
| 1032 w                                        | 1036 w                                       | 1036 w                                      | Phe and CC skeletal stretching of silk fibroin [29] and <b>CC stretching of polymerized phosmer [31,32] *</b>              |
| 1013 w                                        | 1009 w                                       | 1009 w                                      | Phe of silk fibroin [29] and <b>CC stretching of polymerized phosmer [31,32] *</b>                                         |
| 965 m                                         | 965 m                                        | 965 m                                       | Ala-rich sequences in $\beta$ -sheet conformation [48-50]                                                                  |
| 907 s                                         | 907 s                                        | 907 s                                       | Ala-rich sequences in $\beta$ -sheet conformation [48-50]                                                                  |
| 854 w                                         | 854 w                                        | 854 w                                       | Tyr of silk fibroin [29,30,37]                                                                                             |
| 829 w                                         | 829 w                                        | 829 w                                       | Tyr of silk fibroin [29,30,37]                                                                                             |
| 760 vw                                        | 761 vw                                       | 761 vw                                      | Trp of silk fibroin [29] and <b>C-Cl and C-C stretching of phosmers [28] *</b>                                             |
| 644 w                                         | 644 w                                        | 644 w                                       | Tyr of silk fibroin [29]                                                                                                   |

v = very; w = weak; m = medium; s = strong; sh = shoulder; br = broad.  
Trp = tryptophan; Phe = phenylalanine; Tyr = tyrosine, Ser = serine.

**Table S4.** Main IR band wavenumbers and assignments for Tussah silk fibroin fabrics before (T control) and after grafting with phosmer CL, weight gain 13.7% (T CL 13.7%) and phosmer M, weight gain 12.4% (T M 12.4%). The bands having a contribution from phosmers are indicated with asterisks (assignments in bold characters).

| T control<br>$\tilde{\nu}$ / $\text{cm}^{-1}$ | T CL 13.7%<br>$\tilde{\nu}$ / $\text{cm}^{-1}$ | T M 12.4%<br>$\tilde{\nu}$ / $\text{cm}^{-1}$ | Assignments                                                                                                                     |
|-----------------------------------------------|------------------------------------------------|-----------------------------------------------|---------------------------------------------------------------------------------------------------------------------------------|
|                                               | 1732-1717 w                                    | 1732-1717 w                                   | <b>ester C=O stretching of phosmer [31,32] *</b>                                                                                |
| 1695 sh                                       | 1695 sh                                        | 1695 sh                                       | Amide I of anti-parallel $\beta$ -sheet conformation [48]                                                                       |
| 1622 s                                        | 1622 s                                         | 1624 s                                        | Amide I of $\beta$ -sheet conformation [52]                                                                                     |
| 1511 s                                        | 1513 s                                         | 1513 s                                        | Amide II of $\beta$ -sheet conformation [52]                                                                                    |
|                                               | 1453 sh                                        | 1454 sh                                       | <b>CH<sub>2</sub> and CH<sub>3</sub> bending of phosmer [31,32] *</b>                                                           |
| 1444 m                                        | 1444 m                                         | 1444 m                                        | CH <sub>2</sub> bending in silk fibroin [52] and <b>CH<sub>2</sub> and CH<sub>3</sub> bending of phosmer [31,32] *</b>          |
| 1242-1222 m                                   | 1242-1218 m                                    | 1242-1218 m                                   | Amide III of $\beta$ -sheet conformation [48,49]                                                                                |
| 1165 m                                        | 1165-1134 m                                    | 1165-1134 m                                   | CC stretching in silk fibroin [44,45] and <b>COC antisymmetric stretching of phosmer [31,32] and P-O-C stretching [17,43] *</b> |
| 1030 sh                                       | 1034 mw                                        | 1034 mw                                       | CC stretching in silk fibroin [44,45] and <b>P-O stretching [17,43] *</b>                                                       |
|                                               | 1006 mw                                        | 1006 mw                                       | <b>P-O stretching [17,43] *</b>                                                                                                 |
| 963 mw                                        | 963 mw                                         | 963 mw                                        | CH <sub>3</sub> rocking in a $\beta$ -sheet conformation [49] or Ala-Ala linkages [53]                                          |
|                                               | 830 w                                          | 830 w                                         | <b>P-O-C bending [31] *</b>                                                                                                     |
| 673 vw                                        |                                                |                                               | unordered conformations [53]                                                                                                    |

v = very; w = weak; m = medium; s = strong; sh = shoulder.  
Ser = serine.

**Table S5.** Main Raman band wavenumbers and assignments for wool keratin fabrics before (W control) and after grafting with phosmer CL, weight gain 26.6% (W CL 26.6%) and phosmer M, weight gain 12.7% (W M 12.7%). The bands having a contribution from phosmers are indicated with asterisks (assignments in bold characters), those assignable to oxidation products are indicated with triangles (assignments in italic characters).

| W m control<br>$\tilde{\nu} / \text{cm}^{-1}$ | W CL 26.6%<br>$\tilde{\nu} / \text{cm}^{-1}$ | W M 12.7%<br>$\tilde{\nu} / \text{cm}^{-1}$ | Assignments                                                                                                                    |
|-----------------------------------------------|----------------------------------------------|---------------------------------------------|--------------------------------------------------------------------------------------------------------------------------------|
|                                               | 1725 w                                       | 1725 w                                      | <b>ester C=O stretching of phosmer [28] *</b>                                                                                  |
|                                               | 1705 sh                                      | 1705 sh                                     | <b>ester C=O stretching of phosmer [28] *</b>                                                                                  |
| 1673 sh                                       | 1673 sh                                      | 1673 sh                                     | Amide I of $\beta$ -sheet/unordered conformation [55-57]                                                                       |
| 1655 s                                        | 1655 s                                       | 1655 s                                      | Amide I of $\alpha$ -helix conformation [55-57]                                                                                |
| 1614 w                                        | 1614 w                                       | 1614 w                                      | Trp, Tyr, and Phe of wool keratin [55-57]                                                                                      |
| 1607 sh                                       | 1601 s                                       | 1601 s                                      | Trp and Phe of wool keratin [55-57] and <b>phosphorylated Tyr [33] *</b>                                                       |
| 1588 w                                        | 1588 sh                                      | 1588 sh                                     | Phe of wool keratin [55-57]                                                                                                    |
| 1553 vw                                       | 1553 vw                                      | 1553 vw                                     | Trp of wool keratin [55-57]                                                                                                    |
|                                               | 1485 sh                                      | 1485 sh                                     | <b>CH<sub>2</sub> and CH<sub>3</sub> bending of polymerized phosmer [33] *</b>                                                 |
| 1451 m                                        | 1451 s                                       | 1451 s                                      | CH <sub>2</sub> bending in wool keratin [55-57] and <b>CH<sub>2</sub> and CH<sub>3</sub> bending of grafted phosmer [28] *</b> |
| 1398 w                                        | 1398 vw                                      | 1398 vw                                     | C(CH <sub>3</sub> ) <sub>2</sub> antisymmetric bending in wool keratin [55-57] and Ser [41]                                    |
| 1272 m                                        | 1272 m                                       | 1272 m                                      | Amide III of $\alpha$ -helix conformation [55-57]                                                                              |
| 1249 m                                        | 1249 m                                       | 1249 m                                      | Amide III of $\beta$ -sheet/unordered conformation [55-57]                                                                     |
| 1127 m                                        | 1127 m                                       | 1127 m                                      | CC stretching of wool keratin [55-57] and <b>CC stretching of polymerized phosmer [31,32] *</b>                                |
| 1098 w                                        | 1094 m                                       | 1094 m                                      | CC stretching of wool keratin [55-57] and <i>SO<sub>2</sub> symmetric stretching [47,62] ▲</i>                                 |
| 1032 w                                        | 1037 s                                       | 1037 s                                      | Phe and CC stretching of wool keratin [55-57] and <i>cysteic acid [59-61] ▲</i>                                                |
| 1004 s                                        | 1004 s                                       | 1004 s                                      | Phe of wool keratin [55-57]                                                                                                    |
| 936 w                                         | 934 w                                        | 934 w                                       | $\alpha$ -helix conformation [58]                                                                                              |
| 854 w                                         | 854 w                                        | 854 w                                       | Tyr of wool keratin [55-57]                                                                                                    |
| 829 w                                         | 829 w                                        | 829 w                                       | Tyr of wool keratin [55-57]                                                                                                    |
| 760 vw                                        | 760 m                                        | 760 m                                       | Trp of wool keratin [55-57] and <b>C-Cl and C-C stretching of phosmers [28] *</b>                                              |
|                                               | 705 vw                                       |                                             | <b>C-Cl stretching of phosmer CL [28] *</b>                                                                                    |
| 644 w                                         | 644 w                                        | 644 w                                       | Tyr of wool keratin [55-57]                                                                                                    |
| 622 w                                         | 622 w                                        | 622 w                                       | Phe of wool keratin [55-57]                                                                                                    |
|                                               | 570 sh                                       | 570 sh                                      | <i>SO<sub>3</sub> bending [47,62] ▲</i>                                                                                        |
| 547 sh                                        | 547 w                                        | 547 w                                       | SS bridges, trans-gauche-trans conformation [42,63,64]                                                                         |
| 520 sh                                        | 520 sh                                       | 520 sh                                      | SS bridges, gauche-gauche-trans conformation [42,63,64]                                                                        |
| 510 mw                                        | 510 mw                                       | 510 mw                                      | SS bridges, gauche-gauche-gauche conformation [42,63,64]                                                                       |
| 494 sh                                        | 494 sh                                       | 494 sh                                      | SS bridges, strained conformation [42,63,64]                                                                                   |
| 430 sh                                        | 430 w                                        | 430 w                                       | <i>SO<sub>3</sub> rocking [47,62] ▲</i>                                                                                        |
| 412 vw                                        | 412 w                                        | 412 w                                       | <i>SO<sub>3</sub> rocking [47,62] ▲</i>                                                                                        |

v = very; w = weak; m = medium; s = strong; sh = shoulder.  
Trp = tryptophan; Phe = phenylalanine; Tyr = tyrosine, Ser = serine.

**Table S6.** Main IR band wavenumbers and assignments for wool keratin fabrics before (W control) and after grafting with phosmer CL, weight gain 26.6% (W CL 26.6%) and phosmer M, weight gain 12.7% (W M 12.7%). The bands having a contribution from phosmers are indicated with asterisks (assignments in bold characters), those assignable to oxidation products are indicated triangles (assignments in italic characters).

| W control<br>$\tilde{\nu} / \text{cm}^{-1}$                                 | W CL 26.6%<br>$\tilde{\nu} / \text{cm}^{-1}$ | W M 12.7%<br>$\tilde{\nu} / \text{cm}^{-1}$ | Assignments                                                                                                               |
|-----------------------------------------------------------------------------|----------------------------------------------|---------------------------------------------|---------------------------------------------------------------------------------------------------------------------------|
|                                                                             | 1734-1716-1696<br>w                          | 1734-1716-1696<br>w                         | <b>ester C=O stretching of phosmer [31,32] *</b>                                                                          |
| 1646 sh                                                                     | 1646 sh                                      | 1646 sh                                     | Amide I of $\alpha$ -helix conformation [65]                                                                              |
| 1626 s                                                                      | 1626 s                                       | 1626 s                                      | Amide I of $\beta$ -sheet conformation [55,64]                                                                            |
| 1537 sh                                                                     | 1537 sh                                      | 1537 sh                                     | Amide II of $\alpha$ -helix conformation [65]                                                                             |
| 1512 s                                                                      | 1515-1519 s                                  | 1513 s                                      | Amide II of $\beta$ -sheet conformation [55,64]                                                                           |
| 1444 m                                                                      | 1454-1441 sh                                 | 1451 sh                                     | CH <sub>2</sub> bending in wool keratin [55,64] and <b>CH<sub>2</sub> and CH<sub>3</sub> bending of phosmer [31,32] *</b> |
| 1387 m                                                                      |                                              |                                             | OH bending of Ser [47]                                                                                                    |
| 1302 sh                                                                     |                                              |                                             | Amide III of $\alpha$ -helix conformation [65]                                                                            |
| 1230 m                                                                      |                                              |                                             | Amide III of $\beta$ -sheet conformation [55,64]                                                                          |
|                                                                             | 1203 m                                       | 1203 m                                      | <i>SO<sub>2</sub> antisymmetric stretching of alkyl and aryl sulphates [47], sulfoamines and sulfoamides [62] ▲</i>       |
| 1169 w                                                                      | 1166 ms                                      | 1166 ms                                     | <i>cysteic acid [66,67] ▲</i>                                                                                             |
|                                                                             | 1127 w                                       | 1127 w                                      | <i>cystine dioxide [68] ▲</i>                                                                                             |
|                                                                             | 1074 sh                                      | 1074 sh                                     | <i>cystine monoxide [68] ▲</i>                                                                                            |
| 1069 m, br                                                                  |                                              |                                             | CO stretching of Ser [47]                                                                                                 |
|                                                                             | 1034 s                                       | 1034 s                                      | <i>cysteic acid [66,67] ▲</i>                                                                                             |
|                                                                             | 1003 ms                                      | 1005 ms                                     | <i>CO stretching of organic sulphates [47] ▲</i>                                                                          |
|                                                                             | 832 vw                                       | 832 vw                                      | <b>P-O-C bending [31] *</b>                                                                                               |
|                                                                             | 748 vw                                       | 748 vw                                      | <i>SOC symmetric stretching of organic sulphates [47] ▲</i>                                                               |
|                                                                             | 652 vw                                       | 652 vw                                      | <i>SO<sub>3</sub> bending of organic sulphates [47] ▲</i>                                                                 |
| v = very; w = weak; m = medium; s = strong; sh = shoulder.<br>Ser = serine. |                                              |                                             |                                                                                                                           |

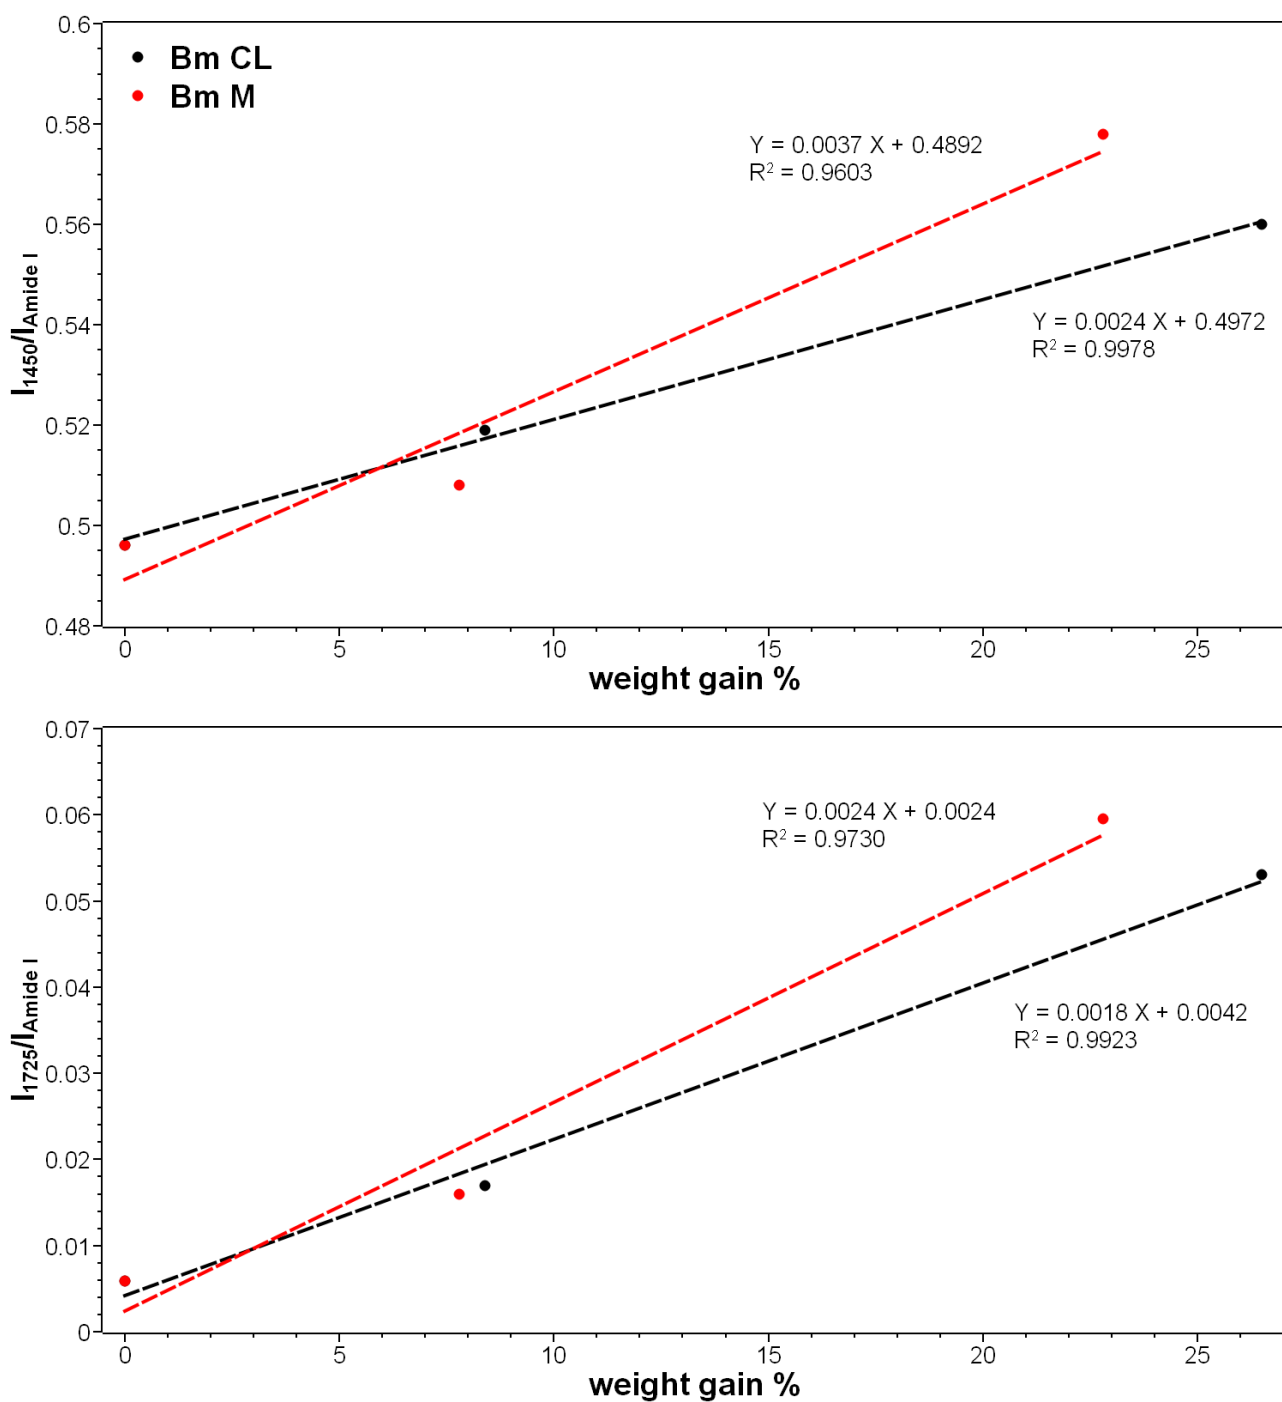

**Figure S1.** Trend of the  $I_{1450}/I_{Amide\ I}$  and  $I_{1725}/I_{Amide\ I}$  Raman intensity ratios as a function of the weight gain for the *B. mori* silk fibroin fabrics grafted with phosmer CL (black) and phosmer M (red), respectively.

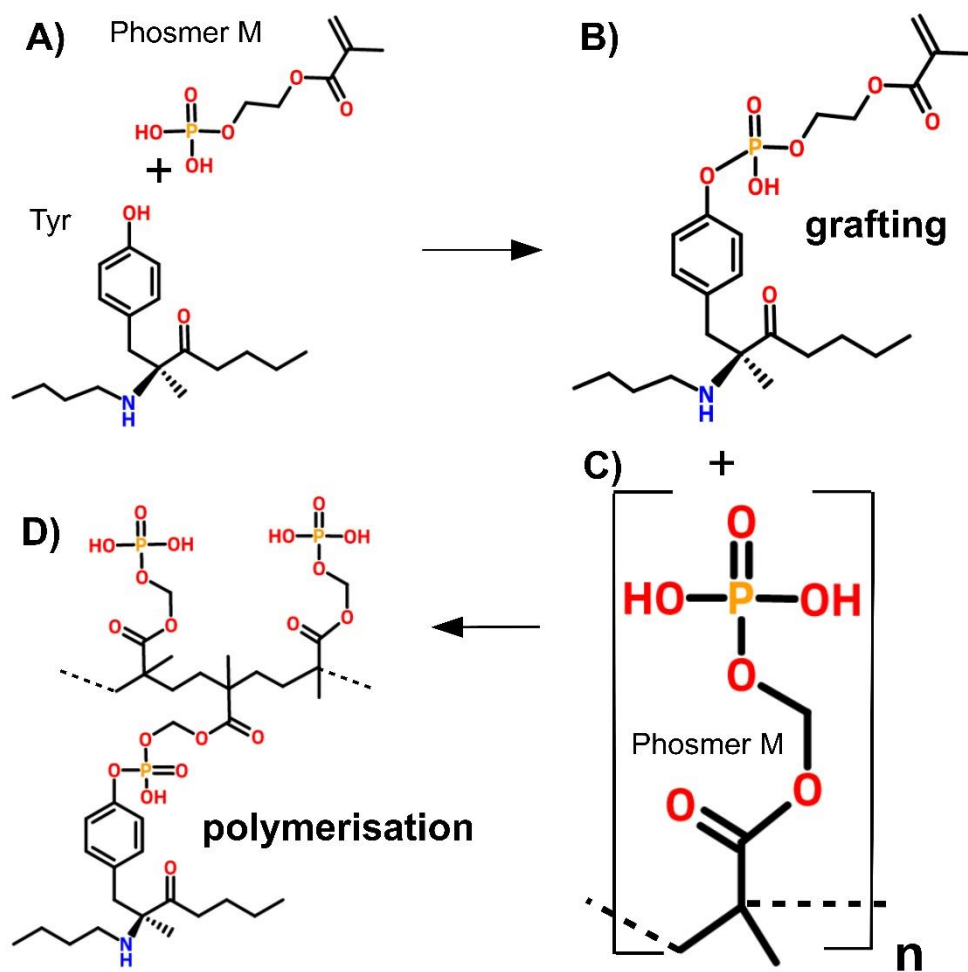

**Figure S2.** Reaction scheme of the functionalization of silk fibroin with phosmer M: A) Phosmer M reacts with silk fibroin (tyrosine is a preferential site); B) grafting reaction between a phosmer M molecule and the Tyr side chain of silk fibroin; C) and D) polymerization.



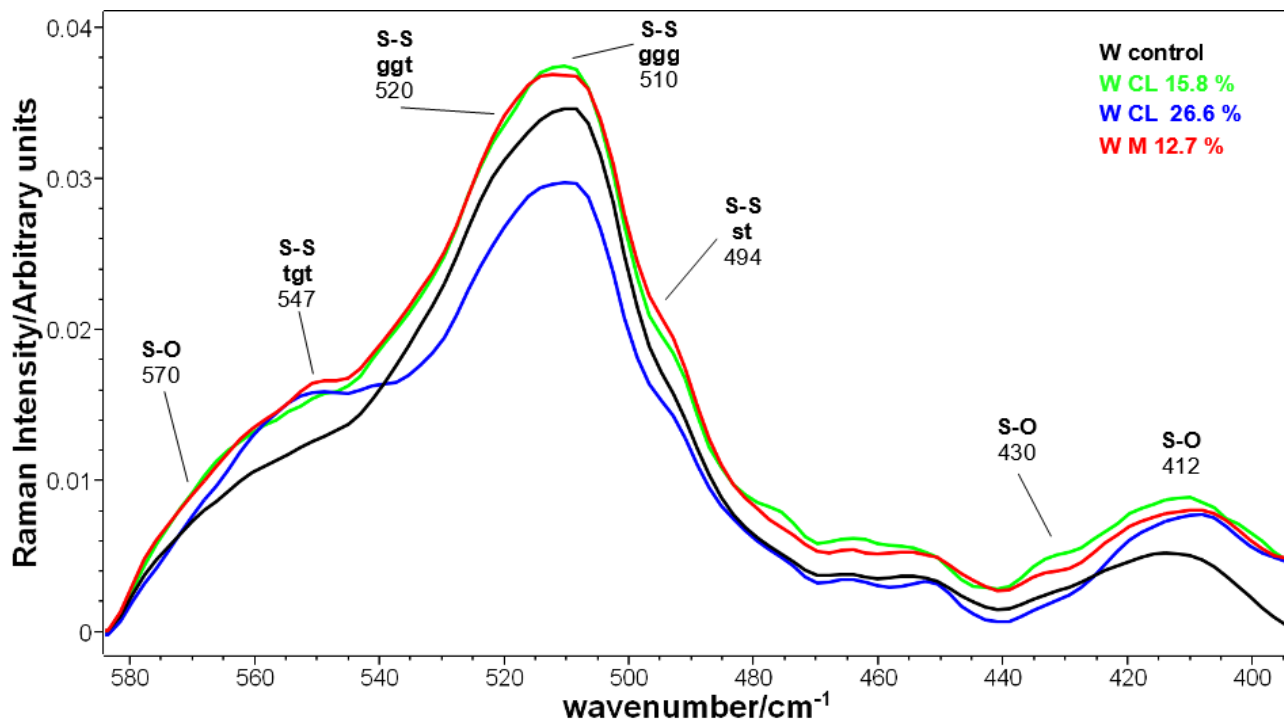

**Figure S3.** Raman spectra of wool keratin fabrics before (control) and after grafting with phosmer CL (weight gains 15.8% and 26.6%) and M (weight gain 12.4%). The spectra are normalized to the Amide I band. The assignments to the main conformations adopted by disulfide bridges (S-S), i.e. strained (st), gauche-gauche-gauche (ggg), gauche-gauche-trans (ggt) and trans-gauche-trans (tgt), as well to sulfated species (S-O) are indicated.

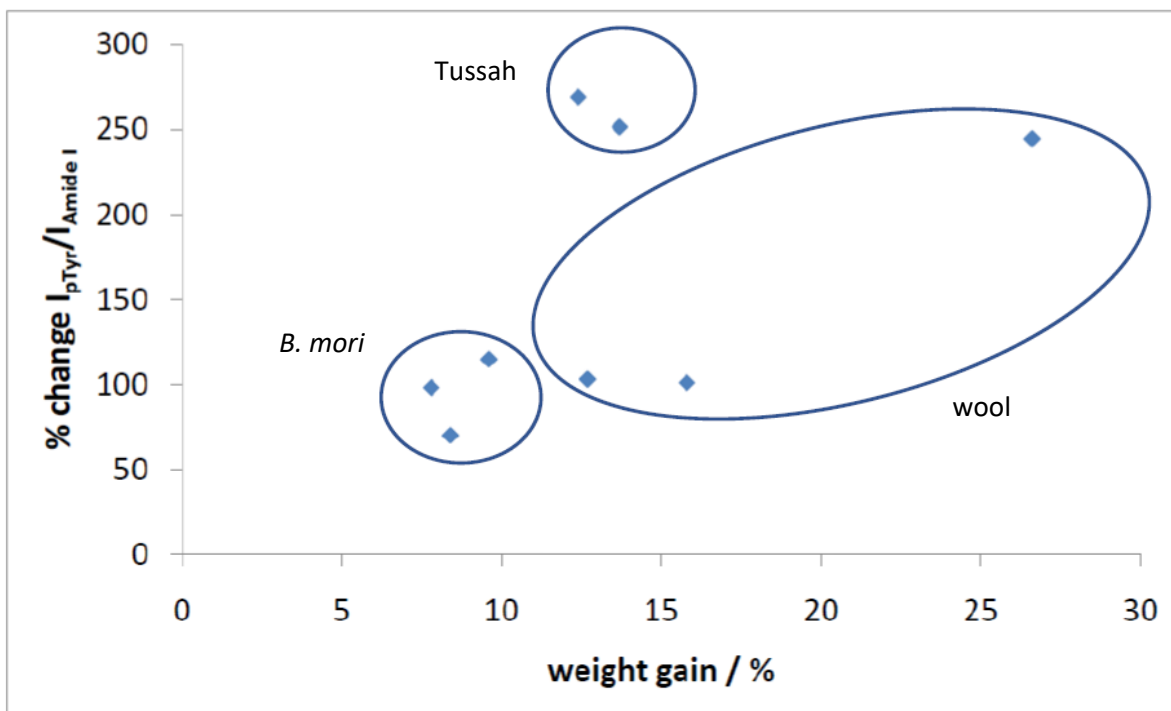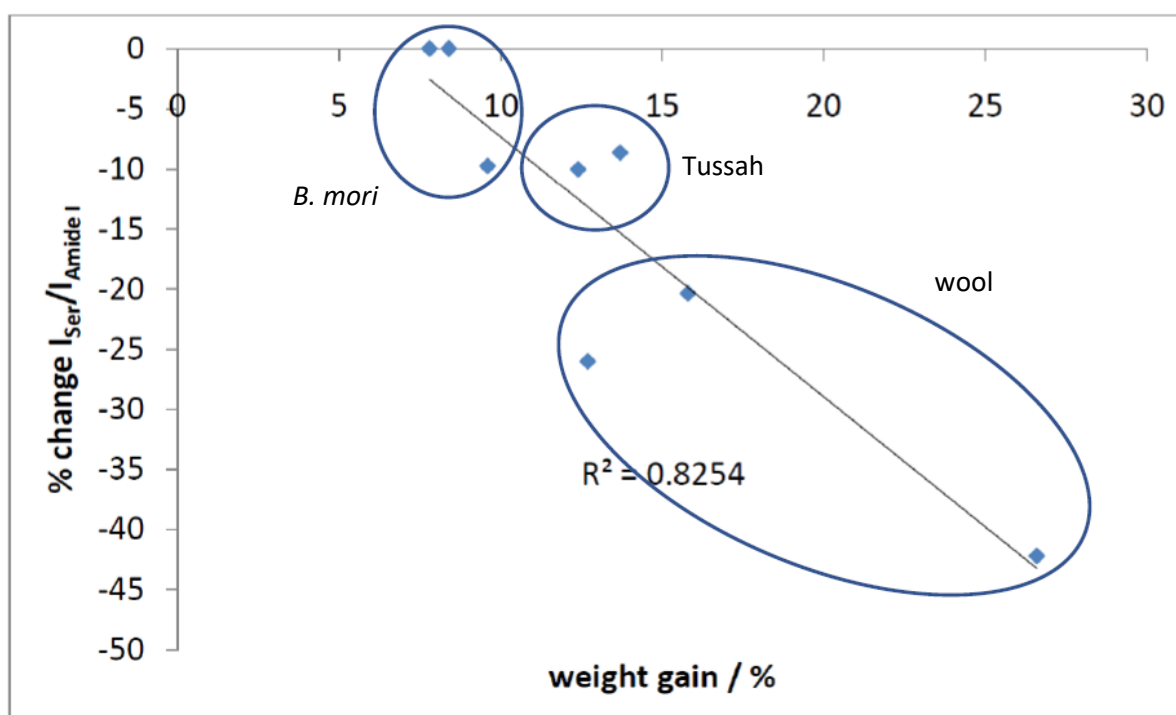

**Figure S4.** Trend of the % change of the  $I_{pTyr}/I_{Amide I}$  ratio (top) and  $I_{Ser}/I_{Amide I}$  (bottom) upon grafting as a function of weight gain for *B. mori* (with the exception of the degraded B m CL 26.5% and B m M 22.8%), Tussah silk fibroin and wool fabrics.

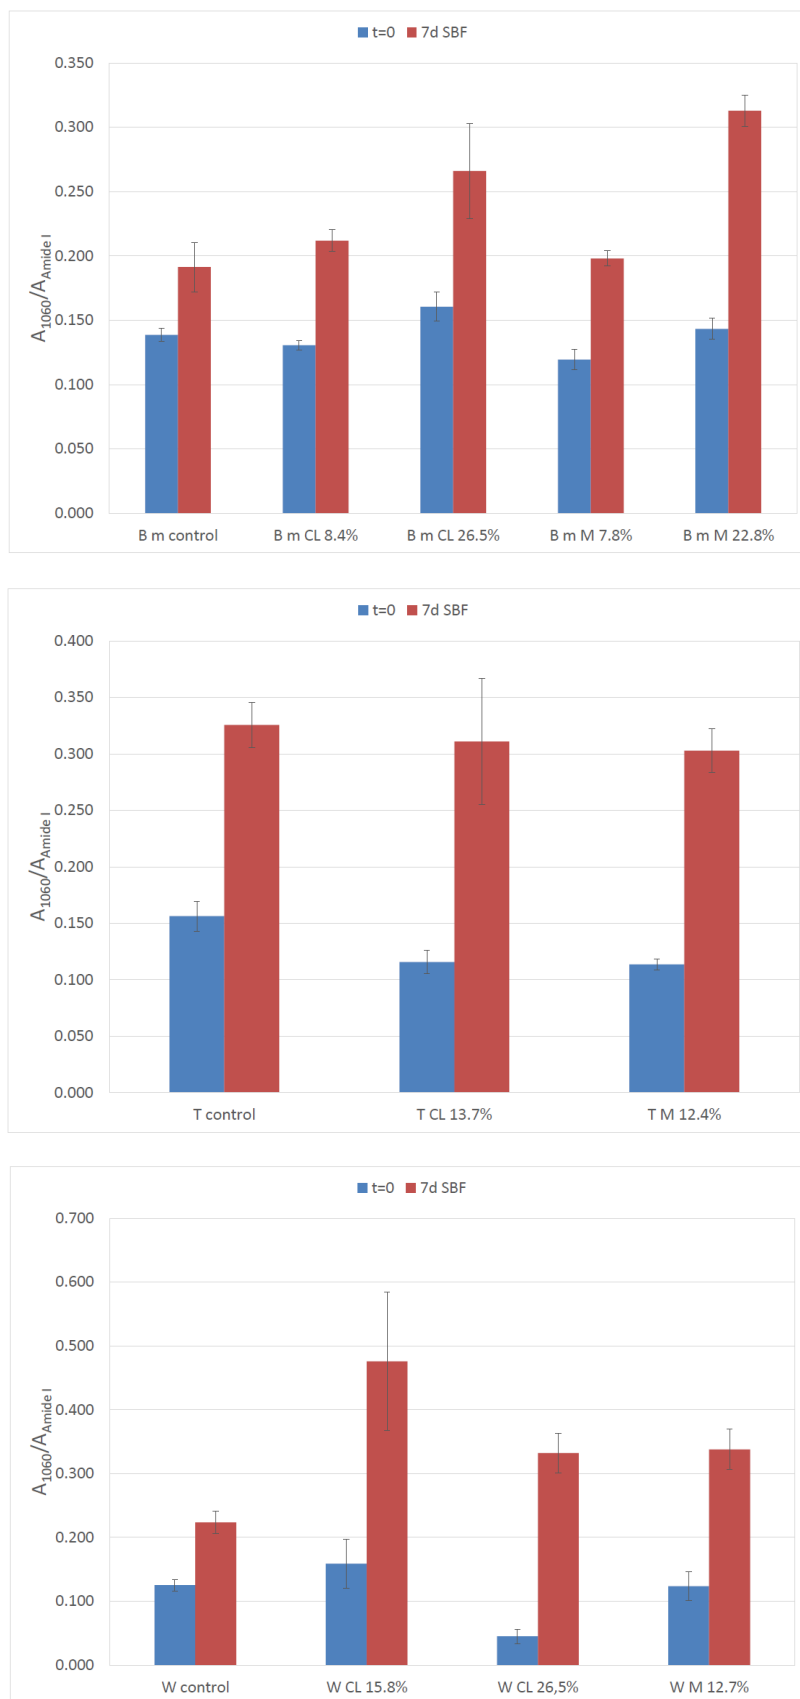

**Figure S5.** Values of the  $A_{1060}/A_{\text{Amide I}}$  absorbance ratio (average  $\pm$  standard deviation), as obtained from the IR spectra of the samples before (t=0) and after bioactivity tests (7d SBF).

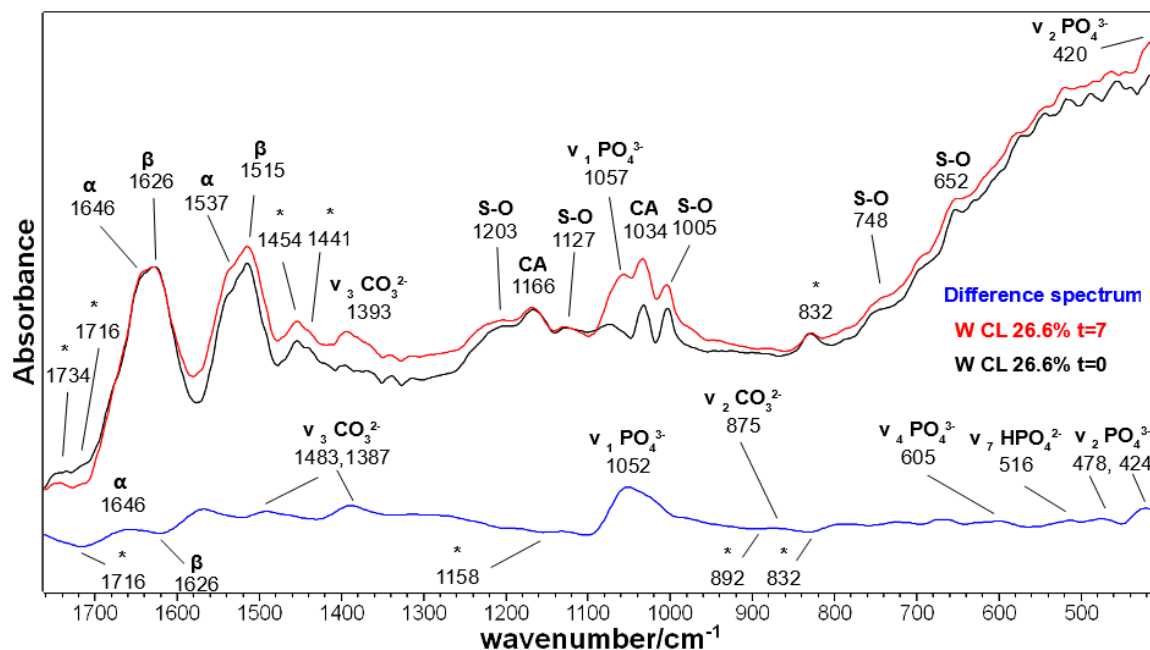

**Figure S6.** IR spectra of wool CL 26.6% fabric before (black) and after (red) immersion in an SBF solution for 7 days. The spectra are normalized to the Amide I band. Difference spectrum was calculated by subtracting the spectrum at  $t=0$  from that at  $t=7$  d. Asterisks indicate the main spectral features ascribable to phosmer. The main bands attributed to  $\beta$ -sheet ( $\beta$ ) and  $\alpha$ -helix ( $\alpha$ ) conformations, as well as to cysteic acid (CA), and other sulfur oxidation products (S-O), carbonate and phosphate are indicated.

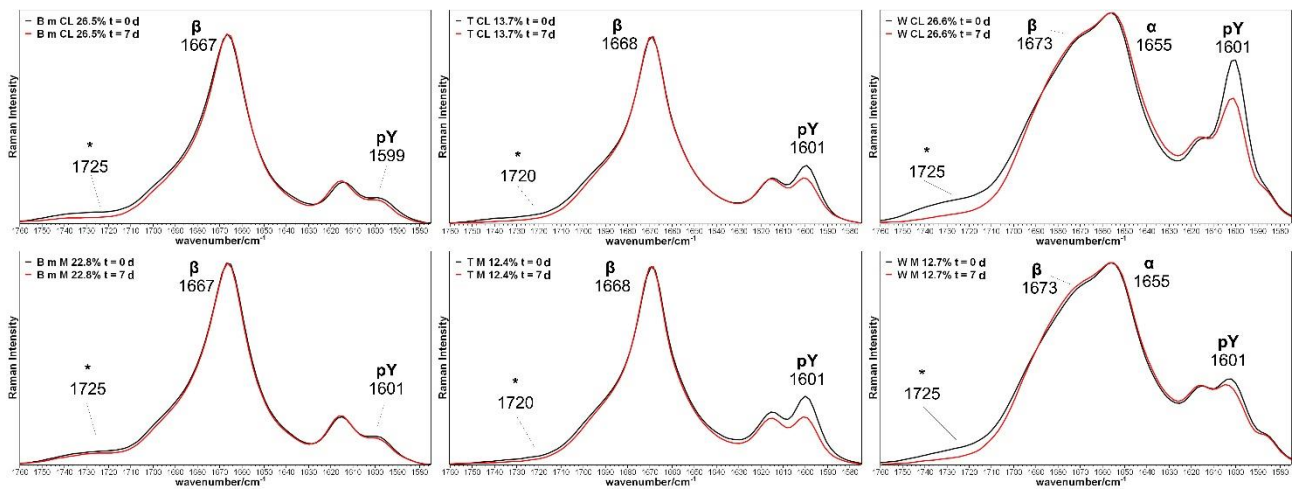

**Figure S7.** Raman spectra of selected grafted fabrics before (black) and after 7 days immersion in SBF (red). The spectra are normalized to the Amide I band. The main bands assignable to  $\beta$ -sheet ( $\beta$ ) or  $\alpha$ -helix ( $\alpha$ ) conformation as well as phosphorylated tyrosine (pY), are indicated.

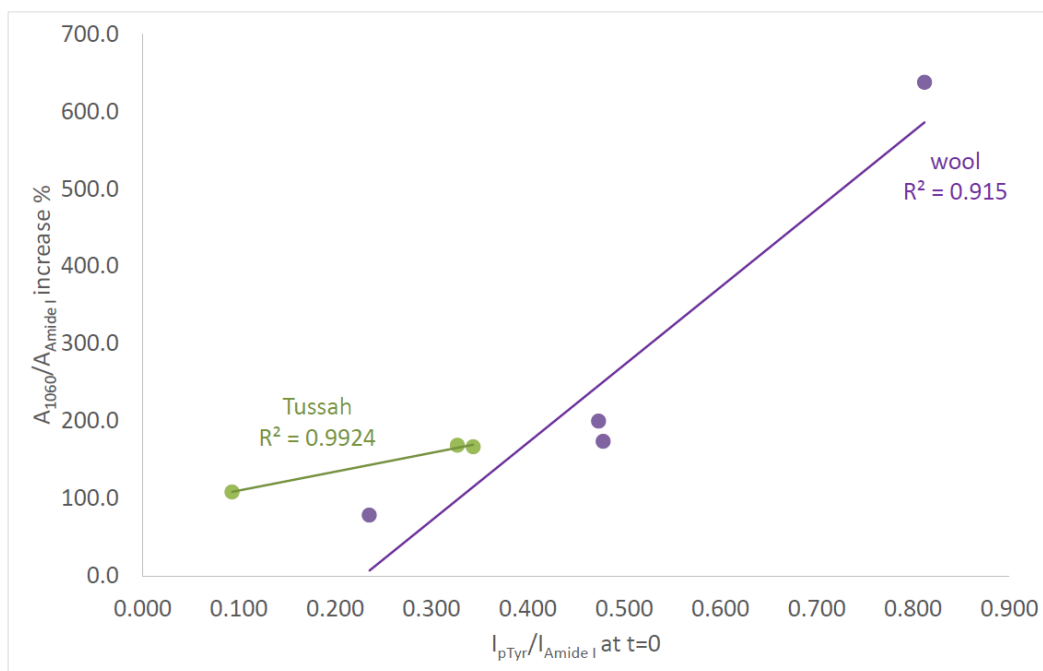

**Figure S8.** Trend of the  $A_{1060}/A_{\text{amide I}}$  IR absorbance ratio increase % after 7 days immersion in the SBF solution and the Raman  $I_{\text{pTyr}}/I_{\text{amide I}}$  intensity ratios of the starting materials (i.e., at  $t=0$ ), for Tussah and wool fabrics.
